# Supplementary material for: Post-Radiotherapy Exosomal Non-Coding RNA and Hemograms for Early Death Prediction in Patients with Cervical Cancer
Source: MDPI journal article supplement (doi:10.3390/ijms25010126), 2023-12-21
Supplement: s1 [file s1]

Table S1. Comparison results of hematological parameters among groups 1 (early death), 2 (progression), and 3 (non-progression) acquired through propensity score matching (Cohort 1)

|             | Group1<br>(N=24)   | Group2<br>(N=24)  | p     | Group2<br>(N=48)    | Group3<br>(N=48)    | p     | Group1<br>(N=24)    | Group3<br>(N=24)    | p     |
|-------------|--------------------|-------------------|-------|---------------------|---------------------|-------|---------------------|---------------------|-------|
| Age         | 55.04 ± 14.23      | 55.88 ± 11.06     | 0.822 | 54.96 ± 13.07       | 52.52 ± 11.13       | 0.328 | 55.04 ± 14.23       | 52.50 ± 11.28       | 0.496 |
| pathology   |                    |                   | 1     |                     |                     | 1     |                     |                     | 1     |
| sqcc        | 21 (87.50%)        | 21 (87.50%)       |       | 43 (89.58%)         | 43 (89.58%)         |       | 21 (87.50%)         | 21 (87.50%)         |       |
| non-sqcc    | 3 (12.50%)         | 3 (12.50%)        |       | 5 (10.42%)          | 5 (10.42%)          |       | 3 (12.50%)          | 3 (12.50%)          |       |
| FIGO stage  |                    |                   | 1     |                     |                     | 1     |                     |                     | 1     |
| 2A-3C1      | 15 (62.50%)        | 15 (62.50%)       |       | 39 (81.25%)         | 39 (81.25%)         |       | 15 (62.50%)         | 15 (62.50%)         |       |
| 3C2-4A      | 9 (37.50%)         | 9 (37.50%)        |       | 9 (18.75%)          | 9 (18.75%)          |       | 9 (37.50%)          | 9 (37.50%)          |       |
| RT_field    |                    |                   | 1     |                     |                     | 1     |                     |                     | 1     |
| pelvis      | 14 (58.33%)        | 14 (58.33%)       |       | 32 (66.67%)         | 32 (66.67%)         |       | 14 (58.33%)         | 14 (58.33%)         |       |
| pelvis c PA | 10 (41.67%)        | 10 (41.67%)       |       | 16 (33.33%)         | 16 (33.33%)         |       | 10 (41.67%)         | 10 (41.67%)         |       |
| TD(EQD2)    | 71.62 ± 6.91       | 73.97 ± 3.88      | 0.155 | 72.25 [69.04;75.88] | 72.25 [68.99;74.23] | 0.686 | 71.36 [67.58;75.36] | 72.25 [69.28;72.81] | 0.468 |
| OT          | 59.00 ± 9.53       | 56.33 ± 9.92      | 0.347 | 52.00 [49.50;60.00] | 56.00 [51.00;63.00] | 0.087 | 59.00 ± 9.53        | 54.38 ± 5.52        | 0.047 |
| SCC0        | 12.30 [1.95;27.95] | 5.05 [1.60;13.50] | 0.271 | 8.50 [1.70;30.60]   | 4.15 [1.60;13.90]   | 0.125 | 12.30 [1.95;27.95]  | 9.40 [2.00;21.60]   | 0.809 |
| SCC2        | 1.80 [1.00;3.80]   | 1.30 [0.50;4.30]  | 0.391 | 2.40 [0.60;7.70]    | 1.00 [0.80;2.60]    | 0.262 | 1.80 [1.00;3.80]    | 1.05 [0.80;2.05]    | 0.14  |
| Cyfra0      | 5.25 [2.15;10.05]  | 6.40 [2.50;12.70] | 0.422 | 5.80 [2.60;11.00]   | 2.25 [1.50;4.20]    | 0.001 | 5.25 [2.15;10.05]   | 2.25 [1.50;19.00]   | 0.286 |
| Cyfra2      | 1.80 [1.20;2.55]   | 1.80 [1.20;3.60]  | 0.934 | 1.80 [1.20;3.45]    | 1.60 [1.00;2.65]    | 0.165 | 1.80 [1.20;2.55]    | 1.55 [1.00;3.00]    | 0.677 |
| Hb0         | 10.80 ± 1.65       | 10.94 ± 1.60      | 0.77  | 11.05 [9.65;12.10]  | 12.15 [10.75;13.15] | 0.008 | 10.80 ± 1.65        | 11.60 ± 1.56        | 0.093 |

|         |                              |                              |       |                              |                              |       |                              |                              |       |
|---------|------------------------------|------------------------------|-------|------------------------------|------------------------------|-------|------------------------------|------------------------------|-------|
| Min Hb  | 9.10 ± 1.29                  | 9.12 ± 0.82                  | 0.958 | 9.00 [8.50;9.85]             | 9.65 [8.90;10.60]            | 0.073 | 9.10 ± 1.29                  | 9.27 ± 1.57                  | 0.698 |
| Hb1     | 9.90 ± 1.32                  | 9.97 ± 1.04                  | 0.834 | 9.94 [9.10;10.91]            | 10.59 [9.79;11.74]           | 0.016 | 9.90 ± 1.32                  | 10.35 ± 1.48                 | 0.272 |
| Hb3     | -0.04 ± 0.14                 | -0.01 ± 0.13                 | 0.502 | -0.04 [-0.11;0.04]           | -0.06 [-0.10;-0.01]          | 0.156 | -0.05 [-0.12;0.04]           | -0.05 [-0.08;-0.01]          | 0.959 |
| PLT0    | 305.50<br>[247.50;343.50]    | 268.50<br>[240.50;349.50]    | 0.503 | 261.00<br>[222.00;297.00]    | 280.00<br>[249.50;320.00]    | 0.206 | 305.50<br>[247.50;343.50]    | 271.50<br>[215.50;300.50]    | 0.122 |
| Min PLT | 148.96 ± 52.01               | 126.33 ± 46.88               | 0.12  | 131.65 ± 45.50               | 134.60 ± 36.67               | 0.727 | 148.96 ± 52.01               | 117.96 ± 33.35               | 0.018 |
| PLT1    | 209.60 ± 51.99               | 187.55 ± 52.29               | 0.15  | 186.30 ± 51.40               | 194.32 ± 45.62               | 0.421 | 198.96<br>[171.16;245.80]    | 173.40<br>[144.30;199.01]    | 0.027 |
| PLT3    | -0.32 ± 0.26                 | -0.28 ± 0.29                 | 0.605 | -0.26 [-0.40;-0.11]          | -0.27 [-0.48;-0.16]          | 0.228 | -0.32 ± 0.26                 | -0.29 ± 0.19                 | 0.634 |
| Mo0     | 511.80 ± 233.11              | 444.25 ± 143.83              | 0.234 | 405.77 ± 171.70              | 495.68 ± 158.42              | 0.009 | 511.80 ± 233.11              | 522.81 ± 160.89              | 0.85  |
| Min Mo  | 245.98 ± 118.34              | 196.15 ± 143.84              | 0.196 | 203.79 ± 131.53              | 250.65 ± 96.63               | 0.05  | 245.98 ± 118.34              | 245.83 ± 107.26              | 0.996 |
| Mo1     | 339.53 ± 130.68              | 279.11 ± 144.28              | 0.135 | 271.14 ± 134.21              | 344.66 ± 106.07              | 0.004 | 339.53 ± 130.68              | 347.93 ± 111.22              | 0.811 |
| Mo3     | -0.30 [-0.63;0.17]           | -0.10 [-0.37;0.10]           | 0.66  | -0.12 [-0.38;0.11]           | -0.22 [-0.37;-0.02]          | 0.344 | -0.30 [-0.63;0.17]           | -0.25 [-0.33;-0.06]          | 0.767 |
| ANC0    | 5273.55<br>[4290.66;7362.00] | 4624.85<br>[3527.04;5901.95] | 0.048 | 4489.32<br>[3527.04;5726.22] | 4356.81<br>[3750.65;6187.30] | 0.547 | 5273.55<br>[4290.66;7362.00] | 4271.40<br>[3765.00;6976.95] | 0.141 |
| Min ANC | 2150.27 ± 1021.49            | 1492.79 ± 771.06             | 0.015 | 1800.23 ± 839.63             | 1685.38 ± 592.56             | 0.441 | 2150.27 ± 1021.49            | 1573.09 ± 646.96             | 0.025 |
| ANC1    | 3290.47<br>[2810.28;3891.17] | 2474.06<br>[1984.73;3111.41] | 0.009 | 2843.89 ± 965.10             | 2853.86 ± 806.19             | 0.956 | 3290.47<br>[2810.28;3891.17] | 2772.70<br>[1990.64;3432.66] | 0.036 |
| ANC3    | -0.41 [-0.70;-0.13]          | -0.33 [-0.63;-0.11]          | 0.533 | -0.32 [-0.59;-0.11]          | -0.26 [-0.56;0.00]           | 0.523 | -0.41 ± 0.40                 | -0.25 ± 0.43                 | 0.193 |
| ALC0    | 1590.99 ± 575.39             | 1821.70 ± 424.55             | 0.121 | 1755.72 ± 578.58             | 1966.47 ± 644.65             | 0.095 | 1590.99 ± 575.39             | 1950.58 ± 647.66             | 0.048 |
| Min ALC | 193.45<br>[144.79;321.55]    | 177.12<br>[137.16;260.10]    | 0.31  | 220.37<br>[156.05;286.95]    | 268.15<br>[169.16;379.60]    | 0.115 | 235.41 ± 128.00              | 263.81 ± 120.47              | 0.433 |
| ALC1    | 506.69<br>[396.25;724.11]    | 550.00<br>[453.78;650.96]    | 0.846 | 579.28<br>[469.12;781.90]    | 713.40<br>[506.60;944.61]    | 0.047 | 593.95 ± 249.14              | 703.91 ± 247.47              | 0.132 |

|      |                  |                  |       |                  |                  |       |                  |                  |       |
|------|------------------|------------------|-------|------------------|------------------|-------|------------------|------------------|-------|
| ALC3 | -1.14 ± 0.41     | -1.27 ± 0.51     | 0.329 | -1.19 ± 0.46     | -1.11 ± 0.40     | 0.377 | -1.14 ± 0.41     | -1.16 ± 0.43     | 0.862 |
| NLR0 | 4.17 [2.84;5.97] | 2.56 [1.78;3.37] | 0.003 | 2.66 [1.81;3.60] | 2.41 [1.73;3.65] | 0.617 | 4.17 [2.84;5.97] | 2.55 [1.77;3.81] | 0.009 |
| NLR1 | 6.33 [4.61;8.70] | 4.42 [2.87;7.12] | 0.022 | 4.53 [2.93;6.55] | 4.01 [3.16;5.06] | 0.202 | 6.33 [4.61;8.70] | 4.07 [3.26;5.08] | 0.002 |
| PLR0 | 0.20 [0.14;0.30] | 0.15 [0.12;0.21] | 0.046 | 0.15 [0.12;0.19] | 0.14 [0.12;0.19] | 0.49  | 0.20 [0.14;0.30] | 0.14 [0.11;0.18] | 0.018 |
| PLR1 | 0.35 [0.27;0.49] | 0.32 [0.24;0.45] | 0.31  | 0.28 [0.23;0.41] | 0.27 [0.21;0.36] | 0.42  | 0.35 [0.27;0.49] | 0.26 [0.20;0.35] | 0.011 |
| LMR0 | 3.04 [2.19;5.27] | 4.31 [3.25;4.97] | 0.125 | 4.53 [3.35;5.82] | 3.98 [3.10;5.18] | 0.12  | 3.04 [2.19;5.27] | 3.98 [2.79;4.98] | 0.407 |
| LMR1 | 1.75 [1.37;2.67] | 2.43 [1.63;2.99] | 0.102 | 2.58 [1.82;3.21] | 2.14 [1.63;2.72] | 0.04  | 1.75 [1.37;2.67] | 2.20 [1.78;2.36] | 0.247 |

CCRT: concurrent chemo-radiotherapy, Sqcc: squamous cell carcinoma, FIGO: International Federation of Gynecology and Obstetrics, RT: radiation therapy, PA: para-aortic region, TD: total dose, EQD2: equivalent dose in 2 Gy fractions, OT: overall treatment time, SCC0: pretreatment SCC antigen, SCC2: SCC antigen during CCRT, Cyfra0: pretreatment carcinoembryonic antigen 21-1, Cyfra2: carcinoembryonic antigen 21-1 during CCRT, Hb: hemoglobin (g/dL), PLT: platelet count  $\times 10^{-3}$  (cells/ $\mu$ L), ANC: absolute neutrophil count (cells/ $\mu$ L), Mo: monocyte count (cells/ $\mu$ L), ALC: absolute lymphocyte count (cells/ $\mu$ L), CBC: complete blood count (Hb, PLT, Mo, ANC, and ALC), CBC0: pretreatment CBC (Hb0, PLT0, Mo0, ANC0, and ALC0), Min CBC: minimum CBC during CCRT (min Hb, min PLT, min Mo, min ANC, and min ALC), CBC1:  $\sqrt{\text{CBC0} \times \text{min CBC}}$  (Hb1, PLT1, Mo1, ANC1, and ALC1), CBC2: CBC second week during CCRT (Hb2, PLT2, Mo2, ANC2, and ALC2), CBC3:  $\log \frac{\text{CBC2}}{\text{CBC0}}$  (Hb3, PLT3, Mo3, ANC3, and ALC3), NLR0:  $\frac{\text{ANC0}}{\text{ALC0}}$ , PLR0:  $\frac{\text{PLT0}}{\text{ALC0}}$ , LMR0:  $\frac{\text{ALC0}}{\text{Mo0}}$ , NLR1:  $\frac{\text{ANC1}}{\text{ALC1}}$ , PLT1:  $\frac{\text{PLT1}}{\text{ALC1}}$ , LMR1:  $\frac{\text{ALC1}}{\text{Mo1}}$

Table S2. Cohort characterization of 42 cervical cancer patients, including exosomal RNA sequencing data (Cohort 2).

| Factors                                | Mean $\pm$ standard deviation or n (%) | n  |
|----------------------------------------|----------------------------------------|----|
| Age                                    | 51.5 $\pm$ 11.0                        | 42 |
| Pathology                              |                                        | 42 |
| Adenocarcinoma                         | 7 (16.7%)                              |    |
| Adeno-squamous cell carcinoma          | 1 (2.4%)                               |    |
| Unknown carcinoma                      | 1 (2.4%)                               |    |
| Squamous cell carcinoma                | 33 (78.6%)                             |    |
| FIGO stage                             |                                        | 42 |
| IB-IIIC1                               | 24 (57.1%)                             |    |
| IIIC2-IVB                              | 18 (42.9%)                             |    |
| Radiotherapy field                     |                                        | 42 |
| pelvis                                 | 31 (73.8%)                             |    |
| pelvis and para-aortic region          | 11 (26.2%)                             |    |
| Treatment time                         | 54.9 $\pm$ 5.3                         | 42 |
| Total dose (EQD2)                      | 75.9 $\pm$ 6.9                         | 42 |
| Follow up date                         | 28.9 $\pm$ 15.2                        | 42 |
| Progression                            |                                        | 42 |
| No                                     | 31 (73.8%)                             |    |
| Local progression                      | 2 (4.8%)                               |    |
| Distant metastasis                     | 6 (14.3%)                              |    |
| Local progression + distant metastasis | 3 (7.1%)                               |    |
| Follow up date                         | 34.0 $\pm$ 13.2                        | 42 |
| Disease specific death                 |                                        | 42 |
| No                                     | 37 (88.1%)                             |    |
| Yes                                    | 5 (11.9%)                              |    |

FIGO: International Federation of Gynecology and Obstetrics, EQD2: equivalent dose in 2 Gy fractions.

Table S3. Selection of early death patients in accordance with disease progression.

| Sl. No. | Diagnosis date | Age | FIGO stage | Death             | Time to death | Progression | Time to progression | 2 <sup>nd</sup> treatment | 3 <sup>rd</sup> treatment | 4 <sup>th</sup> treatment | Early death |
|---------|----------------|-----|------------|-------------------|---------------|-------------|---------------------|---------------------------|---------------------------|---------------------------|-------------|
| 1       | 2019           | 33  | 3C1        | yes               | 5             | LP+DM       | 3                   | CPB#2                     | CT#1                      |                           | yes         |
| 2       | 2019           | 46  | 3C2        | yes               | 5             | LP+DM       | 3                   |                           |                           |                           | yes         |
| 3       | 2019           | 37  | 1B         | yes               | 6             | DM          | 2                   | CPB#2                     | CT#1                      |                           | yes         |
| 4       | 2018           | 61  | 4A         | yes               | 25            | DM          | 5                   | CPB#6                     |                           |                           | yes         |
| 5       | 2019           | 50  | 3C1        | yes               | 34            | LP+DM       | 6                   | CPB#8                     | CT#6                      | Pem#4                     | yes         |
| 6       | 2019           | 53  | 4B         | loss <sup>†</sup> | 7             | DM          | 3                   | CPB#4                     |                           |                           | ?           |
| 7       | 2020           | 44  | 3C2        | no                | 30            | DM          | 12                  | CPB#15                    | CT#6                      |                           | ?           |
| 8       | 2019           | 53  | 3C1        | loss <sup>★</sup> | 21            | DM          | 20                  | RLLobectomy               |                           |                           | no          |
| 9       | 2018           | 33  | 4B         | no                | 49            | DM          | 3                   | CPB#6                     |                           |                           | no          |
| 10      | 2019           | 46  | 3C2        | no                | 45            | LP          | 10                  | CPB#9                     |                           |                           | no          |
| 11      | 2019           | 57  | 3C1        | no <sup>¥</sup>   | 43            | LP          | 33                  | ICR                       |                           |                           | no          |

CPB: cisplatin, paclitaxel, and bevacizumab, CT: cisplatin and topotecan, Pem: pembrolizumab, RLLobectomy: right lower lobectomy, ICR: intracavitary brachytherapy  
<sup>†</sup>refused further treatment despite partial response after four cycles of CPB, <sup>★</sup>transferred to another hospital for further management after RLLobectomy owing to single lung metastasis, <sup>¥</sup>performed ICR owing to cervical recurrence during follow-up after voluntary refusal of ICR on primary concurrent chemo-radiotherapy

In cohort 2 (42 patients), the occurrence of ED was ambiguous in two patients; among the remaining patient subset, propensity score matching was performed on five patients who experienced an ED and 10 patients who remained alive, in a 1:2 ratio.

Table S4. Comparison of hematological variables based on early death through propensity score matching

| Early death                   | Yes<br>(N=5)             | No<br>(N=10)             | p            |
|-------------------------------|--------------------------|--------------------------|--------------|
| Age                           | 45.40 ± 11.06            | 51.60 ± 13.65            | 0.396        |
| Pathology                     |                          |                          | 0.608        |
| non-sqcc                      | 2 (40.00%)               | 6 (60.00%)               |              |
| squamous cell carcinoma       | 3 (60.00%)               | 4 (40.00%)               |              |
| FIGO stage                    |                          |                          | 0.56         |
| 1B-3C1                        | 2 (40.00%)               | 2 (20.00%)               |              |
| 3C2-4B                        | 3 (60.00%)               | 8 (80.00%)               |              |
| Radiotherapy_field            |                          |                          | 1            |
| pelvis                        | 3 (60.00%)               | 7 (70.00%)               |              |
| pelvis and para-aortic region | 2 (40.00%)               | 3 (30.00%)               |              |
| Total dose (EQD2)             |                          |                          | 0.282        |
| -70.98                        | 1 (20.00%)               | 0 (0.0%)                 |              |
| -72.25                        | 1 (20.00%)               | 1 (10.00%)               |              |
| -76.25                        | 0 (0.0%)                 | 4 (40.00%)               |              |
| -81.75                        | 3 (60.00%)               | 5 (50.00%)               |              |
| duration                      | 59.60 ± 2.61             | 54.10 ± 2.28             | 0.001        |
| SCC0                          | 6.60 [0.80;7.00]         | 1.90 [0.80;3.60]         | 0.383        |
| SCC2                          | 2.26 ± 1.69              | 2.02 ± 1.23              | 0.789        |
| Cyfra0                        | 10.20 [2.60;15.30]       | 1.80 [0.90;6.20]         | 0.147        |
| <b>Cyfra2</b>                 | <b>2.20 [2.20;5.60]</b>  | <b>1.65 [1.40;2.20]</b>  | <b>0.067</b> |
| Hb0                           | 12.40 ± 0.38             | 12.33 ± 2.19             | 0.924        |
| min_Hb                        | 9.28 ± 1.53              | 9.95 ± 1.48              | 0.428        |
| Hb1                           | 10.69 ± 0.86             | 11.06 ± 1.71             | 0.666        |
| <b>Hb3</b>                    | <b>-0.20 ± 0.19</b>      | <b>-0.02 ± 0.12</b>      | <b>0.043</b> |
| PLT0                          | 272.00 [239.00;281.00]   | 241.00 [212.00;311.00]   | 0.594        |
| min_PLT                       | 89.60 ± 49.89            | 111.50 ± 37.52           | 0.355        |
| PLT1                          | 147.63 ± 32.30           | 172.82 ± 55.97           | 0.373        |
| PLT3                          | -0.37 ± 0.06             | -0.41 ± 0.33             | 0.708        |
| Mo0                           | 540.20 [394.40;561.00]   | 423.50 [342.00;607.50]   | 0.462        |
| min_Mo                        | 167.42 ± 71.78           | 190.43 ± 91.22           | 0.632        |
| Mo1                           | 294.25 ± 76.92           | 290.36 ± 98.75           | 0.94         |
| Mo3                           | -0.47 ± 0.35             | -0.33 ± 0.40             | 0.506        |
| <b>ANC0</b>                   | <b>5669.04 ± 2001.92</b> | <b>4026.93 ± 1173.06</b> | <b>0.064</b> |
| min_ANC                       | 1581.00 ± 694.86         | 1263.31 ± 391.06         | 0.271        |
| <b>ANC1</b>                   | <b>2910.69 ± 846.94</b>  | <b>2202.60 ± 486.30</b>  | <b>0.057</b> |
| ANC3                          | -0.44 ± 0.57             | -0.23 ± 0.25             | 0.464        |
| ALC0                          | 1596.88 ± 160.85         | 1802.11 ± 413.87         | 0.311        |
| Min ALC                       | 135.32 ± 89.36           | 239.08 ± 136.96          | 0.151        |
| ALC1                          | 448.01 ± 153.82          | 632.68 ± 227.11          | 0.128        |
| ALC3                          | -1.32 ± 0.19             | -1.19 ± 0.47             | 0.569        |
| <b>NLR0</b>                   | <b>3.63 ± 1.44</b>       | <b>2.36 ± 1.03</b>       | <b>0.071</b> |
| <b>NLR1</b>                   | <b>6.73 ± 1.64</b>       | <b>3.82 ± 1.33</b>       | <b>0.003</b> |
| PLR0                          | 0.16 [0.14;0.17]         | 0.12 [0.10;0.18]         | 0.206        |

|      |                  |                  |       |
|------|------------------|------------------|-------|
| PLR1 | 0.35 [0.26;0.42] | 0.25 [0.19;0.38] | 0.31  |
| LMR0 | 3.28 ± 1.32      | 4.18 ± 1.38      | 0.249 |
| LMR1 | 1.58 ± 0.53      | 2.33 ± 1.01      | 0.146 |

CCRT: concurrent chemo-radiotherapy, Sqcc: squamous cell carcinoma, FIGO: International Federation of Gynecology and Obstetrics, PA: para-aortic region, EQD2: equivalent dose in 2 Gy fractions, SCC0: pretreatment SCC antigen, SCC2: SCC antigen during CCRT, Cyfra0: pretreatment Carcinoembryonic antigen 21-1, Cyfra2: Carcinoembryonic antigen 21-1 during CCRT, Hb: hemoglobin (g/dL), PLT: platelet  $\times 10^{-3}$  (cells/ $\mu$ l), ANC: absolute neutrophil count (cells/ $\mu$ l), Mo: monocyte (cells/ $\mu$ l), ALC: absolute lymphocyte count (cells/ $\mu$ l), CBC: complete bleed count (Hb, PLT, Mo, ANC, and ALC), CBC0: pretreatment CBC (Hb0, PLT0, Mo0, ANC0, and ALC0), Min CBC: minimum CBC during CCRT (min Hb, min PTL, min Mo, min ANC, and min ALC), CBC1:  $\sqrt{\text{CBC0} \times \text{min CBC}}$  (Hb1, PLT1, Mo1, ANC1, and ALC1), CBC2: CBC second week during CCRT (Hb2, PLT2, Mo2, ANC2, and ALC2), CBC3:  $\log \frac{\text{CBC2}}{\text{CBC0}}$  (Hb3, PLT3, Mo3, ANC3, and ALC3), NLR0:  $\frac{\text{ANC0}}{\text{ALC0}}$ , PLR0:  $\frac{\text{PLT0}}{\text{ALC0}}$ , LMR0:  $\frac{\text{ALC0}}{\text{Mo0}}$ , NLR1:  $\frac{\text{ANC1}}{\text{ALC1}}$ , PLT1:  $\frac{\text{PLT1}}{\text{ALC1}}$ , LMR1:  $\frac{\text{ALC1}}{\text{Mo1}}$

A substantial variation in Hb3 values was observed between two groups based on whether patients experienced early death (ED). This was attributable to the fact that one out of five patients who experienced ED in Cohort 2 possessed extremely low Hb3 values compared to those that did not.

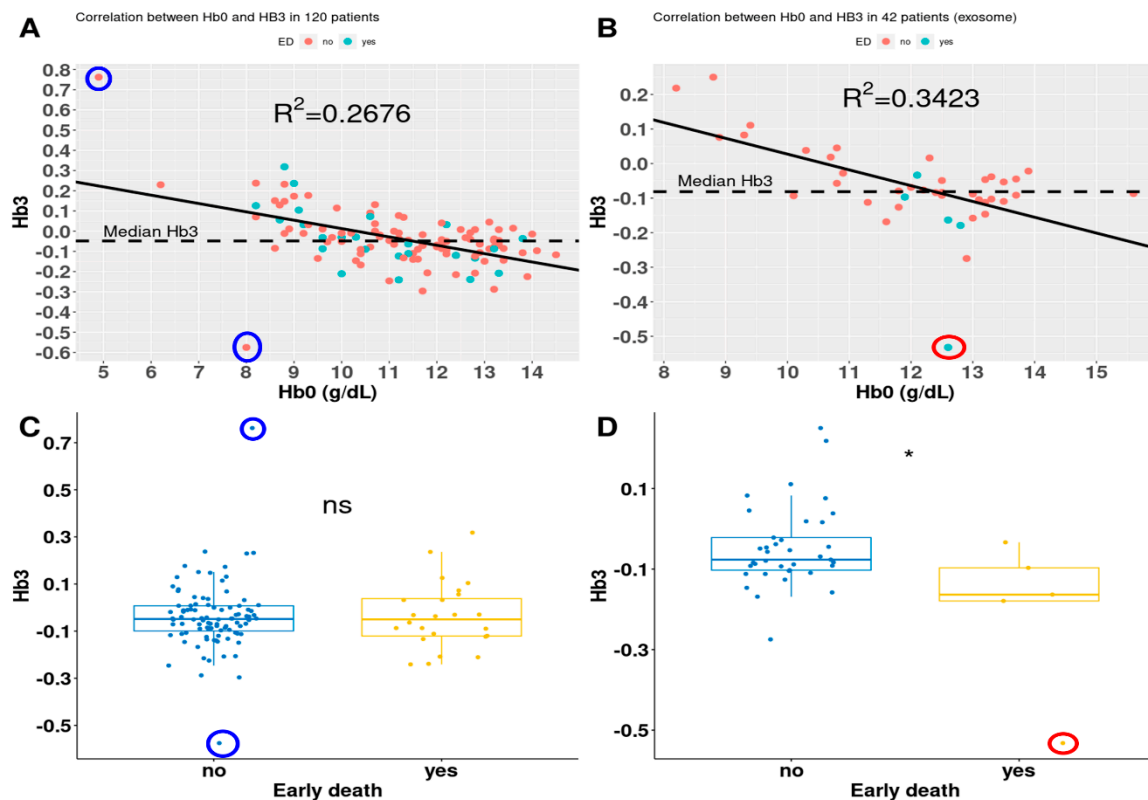

Figure S1. Graphical representation of the association between pretreatment hemoglobin (g/dL) (Hb0) and  $\log \frac{\text{Hb2}}{\text{Hb0}}$  (Hb3) values in (A) cohorts 1 and (B) 2. Boxplots between two groups based on whether the patients suffered early death in (C) cohorts 1 and (D) 2. Hb2: second week during concurrent chemo-radiotherapy. ns: not significant, \*:  $p < 0.05$ , circles symbolize outliers.

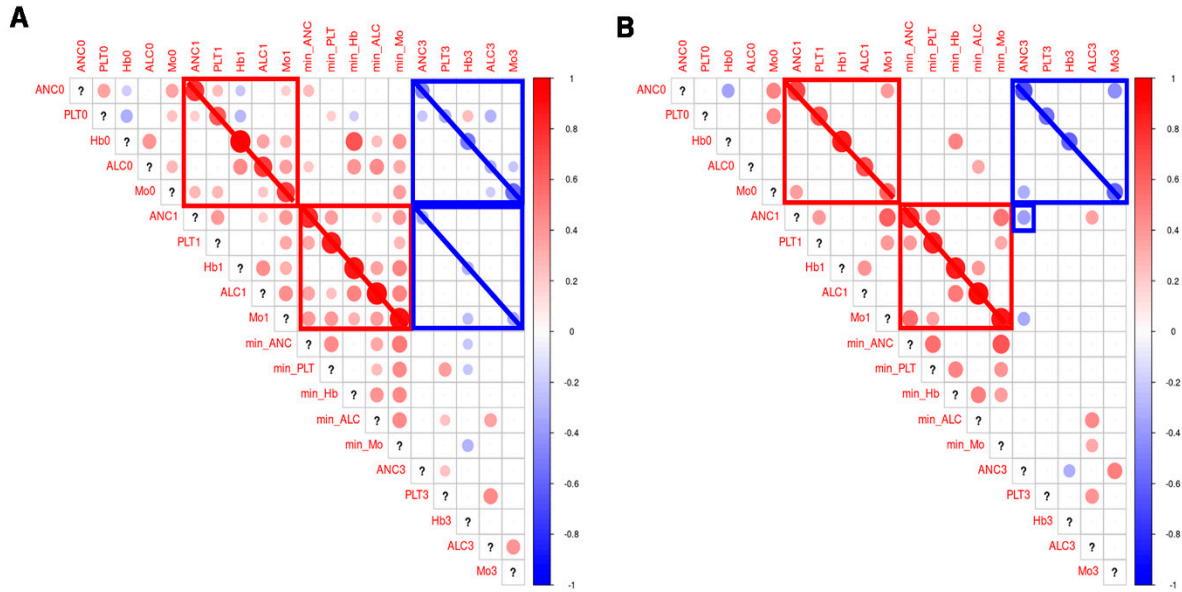

Figure S2. (A) Correlation matrix plot between CBC0, CBC1, CBC3, and min CBC of (A) 120 (cohort 1) and (B) 42 patients (cohort 2)

Hb: hemoglobin (g/dL), PLT: platelet count  $\times 10^{-3}$  (cells/ $\mu$ L), ANC: absolute neutrophil count (cells/ $\mu$ L), Mo: monocyte count (cells/ $\mu$ L), ALC: absolute lymphocyte count (cells/ $\mu$ L), CBC: complete blood count (Hb, PLT, Mo, ANC, and ALC), CBC0: pretreatment CBC (Hb0, PLT0, Mo0, ANC0, and ALC0), Min CBC: minimum CBC during CCRT (min Hb, min PTL, min Mo, min ANC, and min ALC), CBC1:  $\sqrt{\text{CBC0} \times \text{min CBC}}$  (Hb1, PLT1, Mo1, ANC1, and ALC1), CBC2: CBC during second week of CCRT (Hb2, PLT2, Mo2, ANC2, and ALC2), CBC3:  $\log \frac{\text{CBC2}}{\text{CBC0}}$  (Hb3, PLT3, Mo3, ANC3, and ALC3)

Table S5. Number (%) of RNAs related to complete blood counts

| Type | All CBC      | CBC0         | CBC1         | CBC2         | CBC3         | Min CBC      |
|------|--------------|--------------|--------------|--------------|--------------|--------------|
| Hb   | 7943 (48.3%) | 4383 (54.4%) | 2477 (42.5%) | 1132 (18.3%) | 3717 (53.9%) | 1664 (39.4%) |
| ANC  | 4272 (26%)   | 775 (9.6%)   | 814 (14%)    | 1908 (30.8%) | 1678 (24.3%) | 685 (16.2%)  |
| ALC  | 3605 (21.9%) | 1669 (20.6%) | 1148 (19.7%) | 853 (13.8%)  | 914 (13.3%)  | 768 (18.2%)  |
| Mo   | 4656 (28.3%) | 2120 (26.3%) | 899 (15.4%)  | 1178 (19%)   | 802 (11.6%)  | 953 (22.6%)  |
| PLT  | 4653 (29.3%) | 1112 (23.8%) | 1426 (24.5%) | 1863 (30%)   | 754 (10.9%)  | 1261 (29.9%) |

CCRT: concurrent chemo-radiotherapy Hb: hemoglobin (g/dL), PLT: platelet  $\times 10^{-3}$  (cells/ $\mu$ L), ANC: absolute neutrophil count (cells/ $\mu$ L), Mo: monocyte (cells/ $\mu$ L), ALC: absolute lymphocyte count (cells/ $\mu$ L), CBC: complete blood count (Hb, PLT, Mo, ANC, and ALC), CBC0: pretreatment CBC, Min CBC: minimum CBC during CCRT, CBC1:  $\sqrt{\text{CBC0} \times \text{min CBC}}$ , CBC2: CBC second week during CCRT, CBC3:  $\log \frac{\text{CBC2}}{\text{CBC0}}$

All CBC: the number of RNAs associated with at least one of CBC0, CBC1, CBC2, CBC3, or min CBC



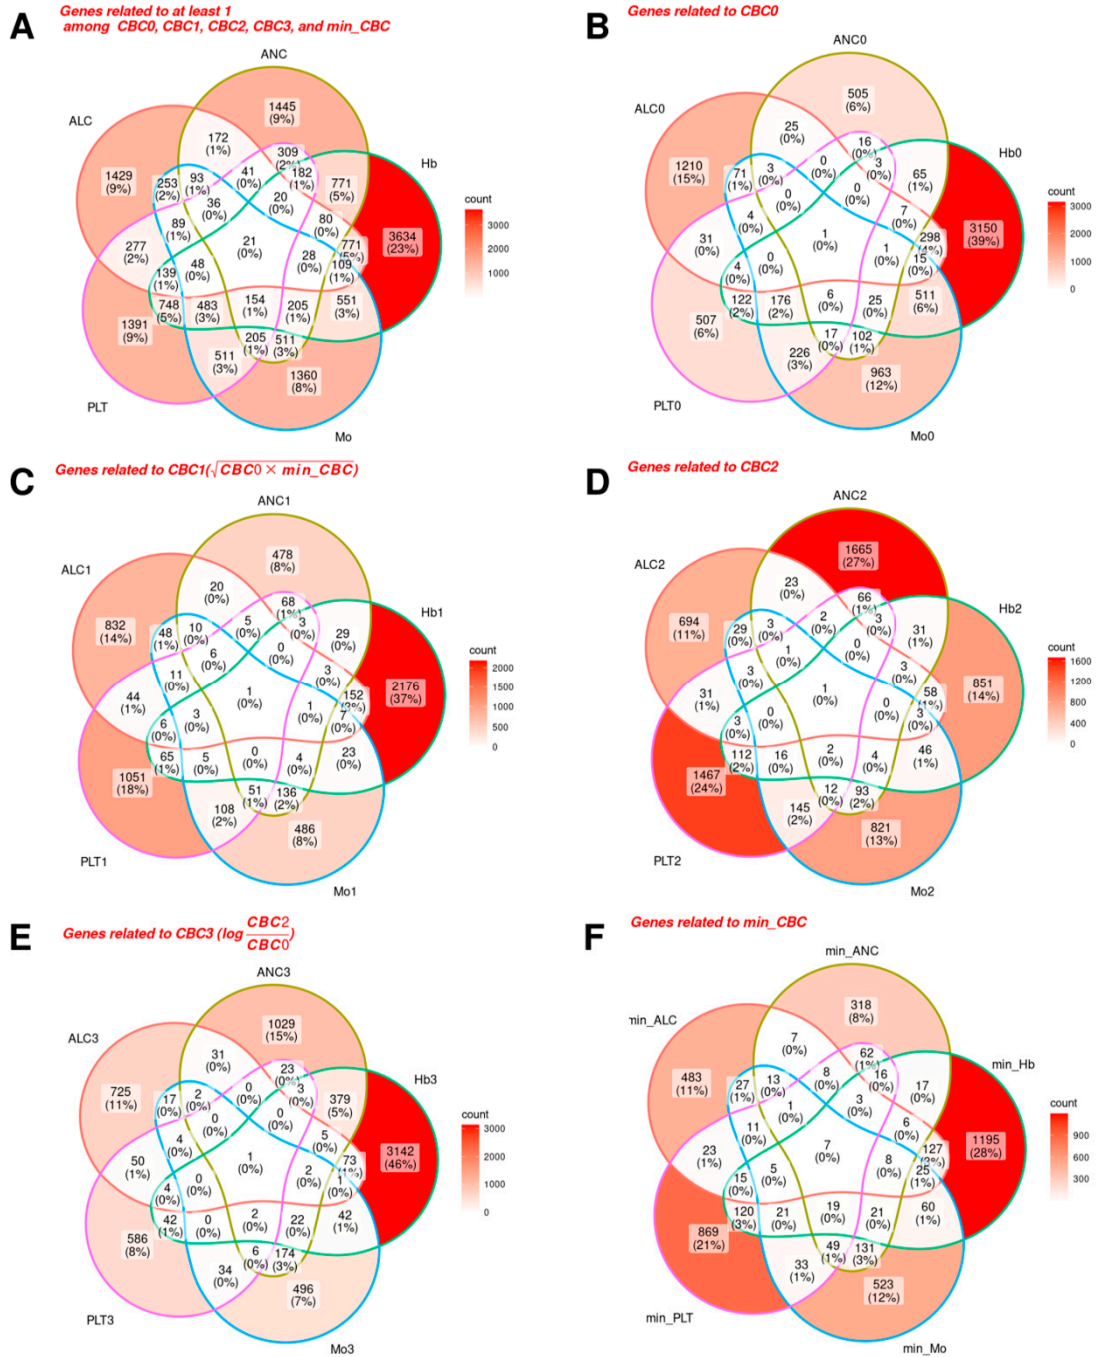

Figure S3. Venn diagrams illustrating the relationships of RNAs relevant to various measures, including (A) all CBC, (B) CBC0, (C) CBC1, (D) CBC2, (E) CBC3, and (F) min CBC.

**A**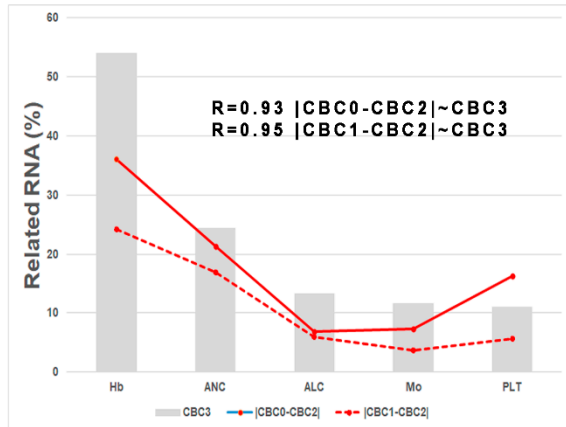**B**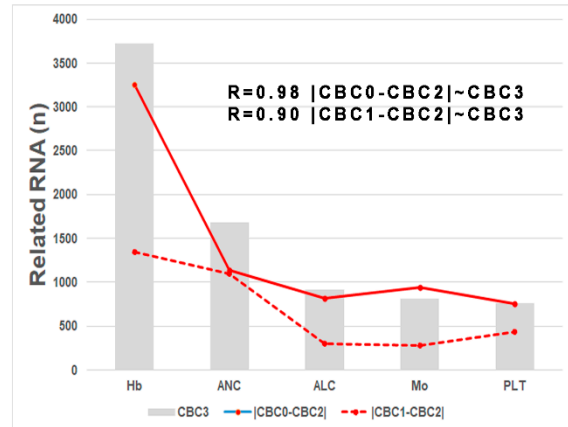

Figure S4. (A) Percentage and (B) number of RNAs relevant to CBC3,  $|CBC0-CBC2|$ , and  $|CBC1-CBC2|$  according to hematological parameters.

R: Pearson's correlation coefficient,  $|CBC0-CBC2|$ : the absolute difference between the number/percentage of RNAs associated with CBC0 and those with CBC2,  $|CBC1-CBC2|$ : the absolute difference between the number/percentage of RNAs associated with CBC1 and those with CBC2

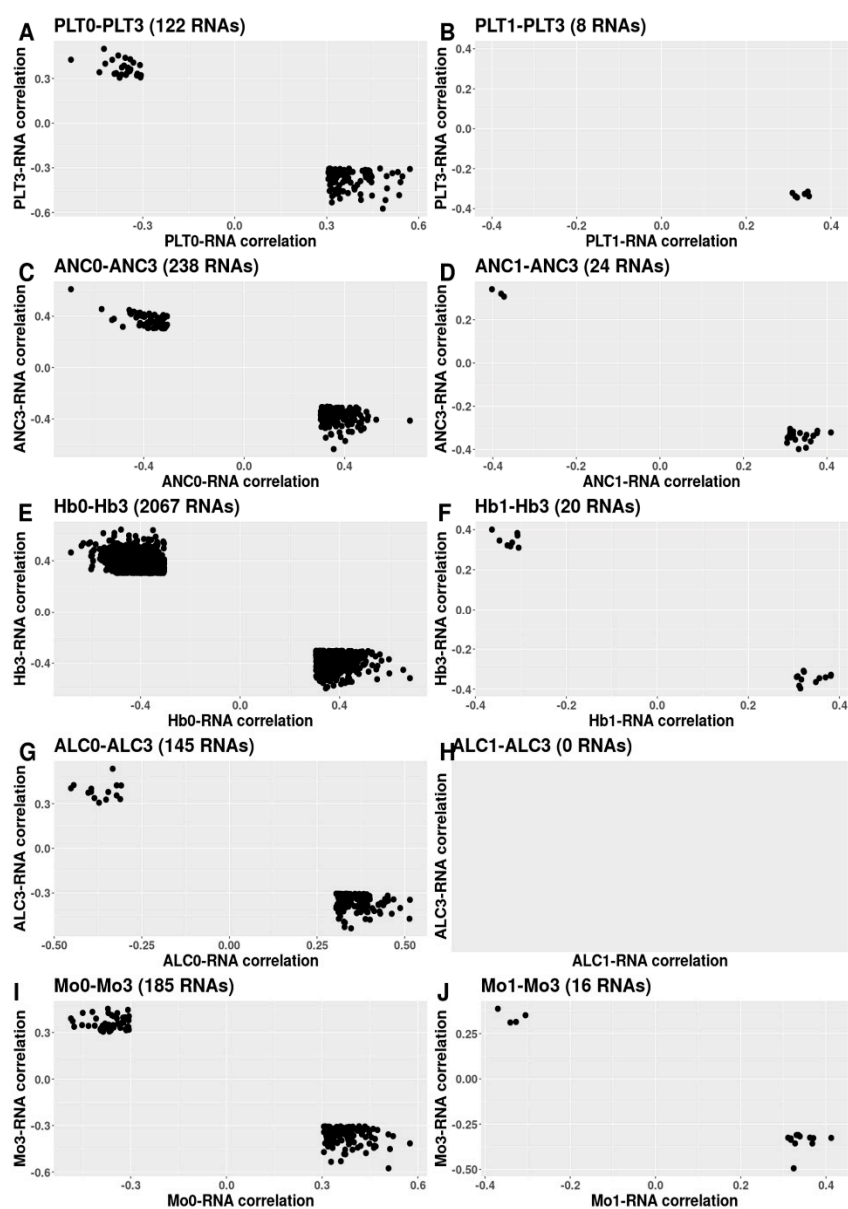

Figure S5. Scatter plots between CBC0-RNA and CBC3-RNA and between CBC1-RNA and CBC3-RNA correlation coefficients.

Table S6. Clinical information in descending order of miR-574-3p-LINC01003-ACOT9 (log<sub>2</sub>FC) values > zero.

| Sl. No. | Diagnosis date | Age | Pathology       | FIGO stage | Early death | Time to death | Progression | Time to progression | miR-574-3p | LINC01003 | ACOT9    | miR-574-3p-LINC01003-ACOT9 (log <sub>2</sub> FC) |
|---------|----------------|-----|-----------------|------------|-------------|---------------|-------------|---------------------|------------|-----------|----------|--------------------------------------------------|
| 1       | 2019           | 37  | adeno, mucinous | 1B         | yes         | 6             | DM          | 2                   | 0.029505   | -5.9484   | 0.146573 | 5.831331                                         |
| 2       | 2019           | 33  | adeno, gastric  | 3C1        | yes         | 5             | LP+DM       | 2                   | 0.905798   | -3.27729  | -1.27091 | 5.454002                                         |
| 3       | 2019           | 46  | sqcc            | 3C2        | yes         | 5             | LP+DM       | 3                   | 0.964931   | -1.93587  | -1.38629 | 4.287088                                         |
| 4       | 2019           | 50  | adeno-sqcc      | 3C1        | yes         | 34            | LP+DM       | 6                   | 0.159406   | -3.41579  | 0.060288 | 3.514905                                         |
| 5       | 2018           | 61  | sqcc            | 4A         | yes         | 25            | DM          | 5                   | 1.415483   | 0.025887  | -1.879   | 3.268595                                         |
| 6       | 2019           | 53  | adeno-sqcc      | 4B         | loss        | 7             | DM          | 3                   | -0.04338   | -0.38931  | -2.37895 | 2.724888                                         |
| 7       | 2020           | 44  | adeno, gastric  | 3C2        | no          | 30            | DM          | 12                  | 0.189702   | -0.41053  | -1.8549  | 2.455125                                         |
| 8       | 2019           | 52  | sqcc            | 3C1        | no          | 40            | no          | 40                  | 0.426518   | -2.92084  | 0.994822 | 2.352531                                         |
| 9       | 2019           | 37  | sqcc            | 3C1        | no          | 40            | no          | 40                  | -0.12042   | -1.9207   | 0.190166 | 1.610119                                         |
| 10      | 2018           | 39  | sqcc            | 3C1        | no          | 47            | no          | 47                  | -0.89175   | -1.48783  | -0.72384 | 1.319917                                         |
| 11      | 2019           | 63  | sqcc            | 1B         | no          | 38            | no          | 38                  | 0.421173   | 0.167139  | -0.64469 | 0.89872                                          |
| 12      | 2019           | 39  | sqcc            | 3C1        | no          | 44            | no          | 35                  | 0.303904   | -0.60316  | 0.454039 | 0.453027                                         |
| 13      | 2018           | 33  | sqcc            | 4B         | no          | 49            | DM          | 3                   | 0.21782    | -0.94736  | 0.872771 | 0.292411                                         |
| 14      | 2020           | 40  | sqcc            | 3C1        | no          | 33            | no          | 33                  | -0.17821   | -0.10284  | -0.11716 | 0.041788                                         |

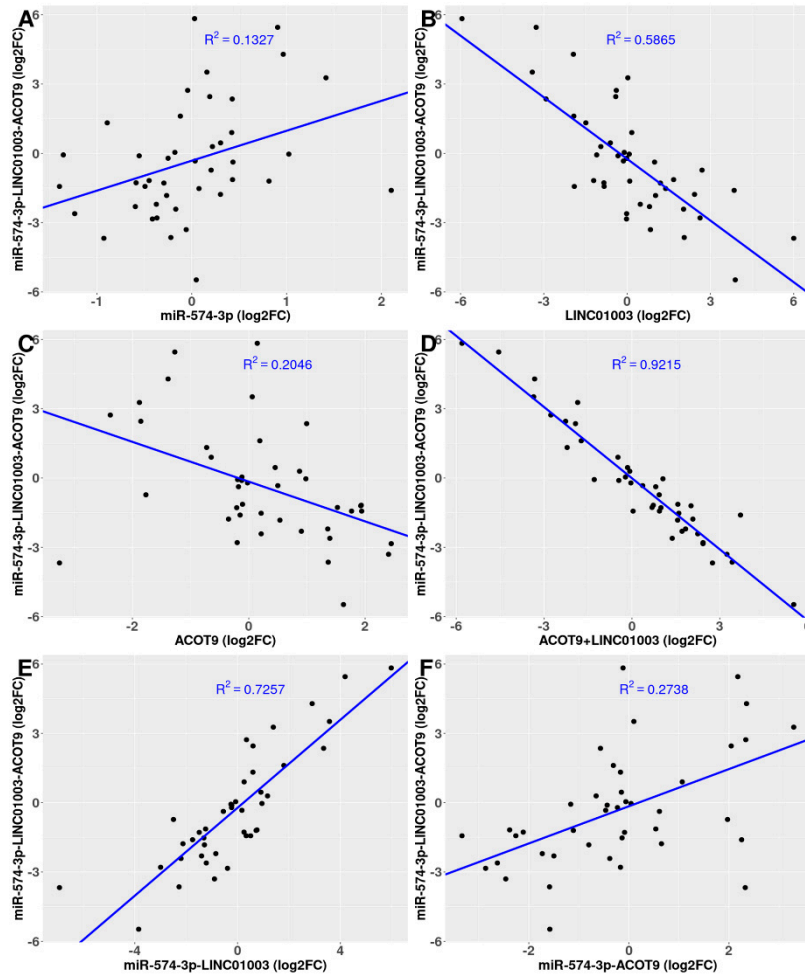

Figure S6. Linear regressions between the log<sub>2</sub> fold change (log<sub>2</sub> FC) values of miR-574-3p-LINC01003-ACOT9 and their constituent elements.
